# Supplementary material for: Negative photochromism of a blue cyanine dye
Source: Royal Society of Chemistry journal article supplement (doi:10.1039/d0cc06359b), 2020-01-01
Supplement: d0cc06359b1.pdf [file d0cc06359b1.pdf]

## Electronic Supplementary Information (ESI)

### Negative Photochromism of a Blue Cyanine Dye

Kazuki Nemoto, Masami Enoki, Ryuzi Katoh,\* Katsufumi Suzuki, Tetsuji Murase, Shigeaki Imazeki

#### Contents

|                                                                                           |     |
|-------------------------------------------------------------------------------------------|-----|
| 1. Apparatus.....                                                                         | S2  |
| 2. Synthesis.....                                                                         | S2  |
| 3. Recovery time at room temperature.....                                                 | S7  |
| 4. Photochromic reaction of BCy in polar solvents.....                                    | S8  |
| 5. DFT calculation.....                                                                   | S8  |
| 6. NMR study on the molecular structure of BCy before and<br>after light irradiation..... | S18 |
| 7. Quantum yield of the photochromic reaction of BCy in toluene .....                     | S21 |
| 8. Temperature dependence of the recovery time.....                                       | S23 |

## 1. Apparatus

The photochromic reaction was induced by photoirradiation with an AM1.5 solar simulator (LAX-C100, Asahi Spectra) at 1 sun intensity. Absorption spectra were measured with an absorption spectrometer (V-670, JUSCO or UV-2450, Shimadzu) fitted with a temperature control attachment (CPS-240A, Shimadzu) to measure temperature-dependence of the temporal change in absorbance.

NMR spectra were measured in DMSO- $d_6$  on a spectrometer (AL-400, 400 MHz, JEOL) with tetramethylsilane (TMS) as an internal standard. DMSO- $d_6$  was used as an internal standard ( $\delta = 77.0$ ) in  $^{13}\text{C}$ -NMR at 100 MHz. Commercial Merck plates coated with silica gel 60 F-254 were used for analytical thin-layer chromatography, which was visualized by irradiating with UV light. Column chromatography was performed using Wakosil C-200 from FUJIFILM Wako Pure Chemical Corporation, Japan, from which all reagents were obtained.

## 2. Synthesis

Synthesis of the compounds used in the present study is summarized here. Compound **3** was prepared from compounds **1** and **2** by a reported procedure [L. Yuan, W. Lin, Y. Yang, H. Chen, *J. Am. Chem. Soc.*, 2012, 134, 1200-1211.].

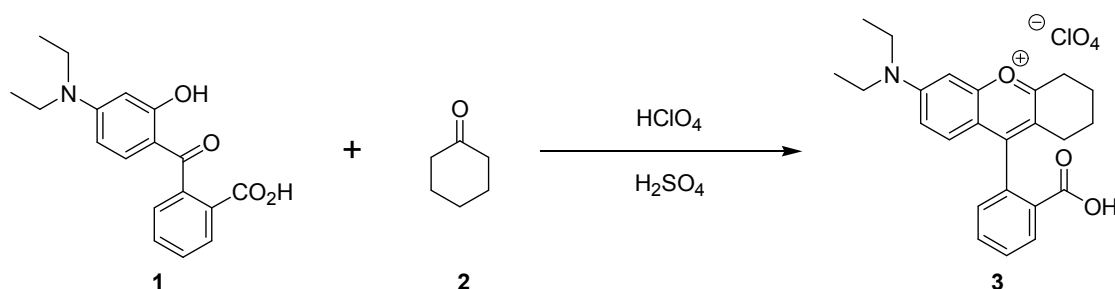

**((E)-N-(9-(2-carboxyphenyl)-5-((9-ethyl-9H-carbazol-3-yl)methylene)-5,6,7,8-tetrahydro-3H-xanthen-3-ylidene)-N-ethylethanaminium tetrakis(pentafluorophenyl)borate (**6**):**

*N*-ethylcarbazole-3-carboxyaldehyde (**4**) (1.9 g, 8.4 mmol) was added to a solution of **3** (3.8 g, 8.0 mmol) in acetic anhydride (23 mL) at room temperature, and the reaction mixture was heated to 60 °C and stirred for 4 h. After the solvent was removed under vacuum, perchlorate (**5**) was obtained as a black solid. Anion exchange was performed by treating **5** (5.5 g, 8.0 mmol) with lithium tetrakis(pentafluorophenyl)borate (6.1 g, 8.0 mmol) in  $\text{CH}_2\text{Cl}_2$  (51 mL). After being stirred at room temperature for 2 h, the reaction was quenched by adding water. After separation of the aqueous layer, the organic layer was washed with brine, dried over anhydrous  $\text{Na}_2\text{SO}_4$ , and concentrated to dryness. Purification of the crude mixture by column chromatography ( $\text{SiO}_2$ ,  $\text{CH}_2\text{Cl}_2/\text{acetone} = 5/1$ , v/v) gave **6** as a blue solid in 51% yield from **3**. Melting point: 105–108 °C (from  $\text{CH}_2\text{Cl}_2/\text{acetone}$ );  $R_f = 0.6$  ( $\text{CH}_2\text{Cl}_2/\text{acetone} = 5/1$ );  $^1\text{H}$ -NMR (400 MHz,  $\text{CD}_2\text{Cl}_2$ )  $\delta$  8.43 (1H, s), 8.38 (1H, s), 8.33 (1H, d,  $J = 8.2$  Hz), 8.17 (1H, d,  $J = 7.8$  Hz), 7.82–7.76 (2H, m), 7.72 (1H, td,  $J = 7.6, 1.2$  Hz), 7.59–7.49 (3H, m),

7.33 (1H, t,  $J = 7.3$  Hz), 7.20 (1H, d,  $J = 6.9$  Hz), 7.07 (1H, d,  $J = 9.6$  Hz), 6.98 (1H, d,  $J = 2.7$  Hz), 6.96 (1H, s), 4.44 (2H, q,  $J = 7.3$  Hz), 3.62 (4H, q,  $J = 7.2$  Hz), 3.17 (2H, t,  $J = 6.2$  Hz), 2.45 (2H, q,  $J = 5.3$  Hz), 1.92–1.86 (2H, m), 1.48 (3H, t,  $J = 7.3$  Hz), 1.34 (6H, t,  $J = 7.2$  Hz);  $^{13}\text{C}$ -NMR (101 MHz,  $\text{CD}_2\text{Cl}_2$ )  $\delta$  167.09, 164.01, 163.67, 158.77, 155.58, 150.19–149.56, 147.70–147.16, 141.56, 141.10, 140.53, 140.15–139.73, 138.41–137.64, 135.88–135.21, 135.05, 133.46, 132.11, 130.59, 130.39, 130.13, 130.02, 128.92, 127.13, 126.88, 125.86, 124.51, 123.99, 123.16, 123.07, 120.86, 120.46, 117.35, 117.12, 109.75, 109.59, 95.75, 46.43, 38.36, 27.90, 26.38, 21.84, 13.98, 12.58; FT-IR  $\nu_{\text{max}}$  (ATR,  $\text{cm}^{-1}$ ) 1708, 1630, 1580, 1530, 1512, 1460, 1398, 1380, 1345, 1322, 1262, 1233, 1179, 1150, 1124, 1082, 1024, 975, 920, 819, 774, 755, 709, 683, 660, 608, 573, 536, 496, 424; HRMS (ESI $^{+}$ ) calculated for  $[\text{M}]^{+}$   $m/z = 581.2779$  ( $\text{C}_{39}\text{H}_{37}\text{N}_2\text{O}_3$ ), Found  $m/z = 581.2804$

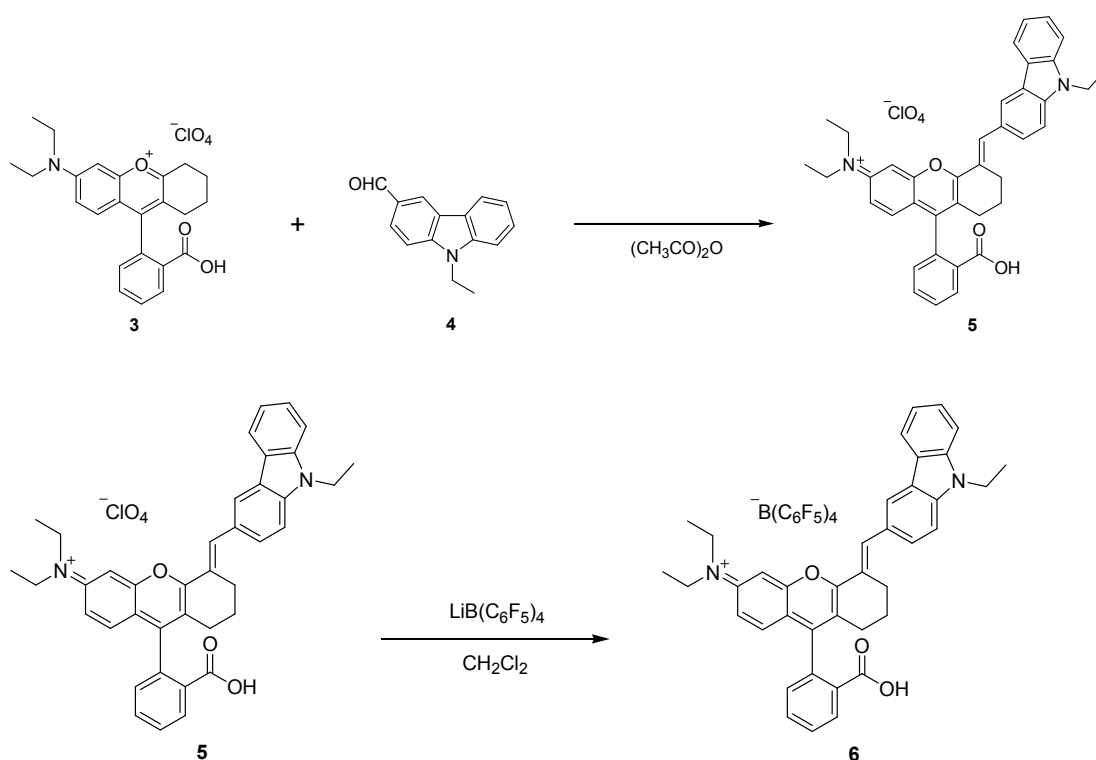

**(*E*)-*N*-ethyl-*N*-(5-((9-ethyl-9*H*-carbazol-3-yl)methylene)-9-(2-((2-(methacryloyloxy)ethoxy)carbonyl)phenyl)-5,6,7,8-tetrahydro-3*H*-xanthen-3-ylidene)ethanaminium tetrakis(pentafluorophenyl)borate (**8**, BCy):**

1-Ethyl-3-(3-dimethylaminopropyl)carbodiimide hydrochloride (1.3 g, 6.9 mmol) was added to the solution of **6** (5.1 g, 4.1 mmol), 2-hydroxyethyl methacrylate (**7**) (0.6 g, 4.9 mmol), and 4-dimethylaminopyridine (50 mg, 0.4 mmol) in  $\text{CH}_2\text{Cl}_2$  (34 mL). After being stirred for 5 h at room temperature, the reaction was quenched by adding water. After separation of the aqueous layer, the organic layer was washed with brine, dried over anhydrous  $\text{Na}_2\text{SO}_4$ , and concentrated to dryness. Purification of the crude mixture by column chromatography ( $\text{SiO}_2$ ,  $\text{CH}_2\text{Cl}_2$ ) gave **8** in 21% yield as a

blue solid. Melting point: 110–112 °C (from CH<sub>2</sub>Cl<sub>2</sub>); R<sub>f</sub> = 0.5 (CH<sub>2</sub>Cl<sub>2</sub>); <sup>1</sup>H-NMR (400 MHz, DMSO-d<sub>6</sub>) δ 8.58 (1H, s), 8.47 (1H, s), 8.30 (1H, d, *J* = 7.8 Hz), 8.26 (1H, d, *J* = 7.8 Hz), 7.94 (1H, t, *J* = 7.1 Hz), 7.88 (1H, d, *J* = 8.7 Hz), 7.83 (1H, t, *J* = 8.0 Hz), 7.81 (1H, d, *J* = 8.7 Hz), 7.71 (1H, d, *J* = 8.2 Hz), 7.55 (1H, t, *J* = 7.8 Hz), 7.45 (1H, d, *J* = 7.3 Hz), 7.39 (1H, d, *J* = 2.3 Hz), 7.31 (1H, t, *J* = 7.8 Hz), 7.27 (1H, dd, *J* = 10.1, 2.3 Hz), 6.98 (1H, d, *J* = 9.6 Hz), 5.88 (1H, s), 5.62 (1H, s), 4.53 (2H, q, *J* = 7.3 Hz), 4.39 (2H, d, *J* = 4.1 Hz), 4.15 (2H, d, *J* = 4.1 Hz), 3.70 (4H, q, *J* = 7.2 Hz), 3.12 (2H, t, *J* = 6.0 Hz), 2.40–2.31 (2H, m), 1.88–1.73 (2H, m), 1.79 (3H, s), 1.38 (3H, t, *J* = 7.3 Hz), 1.27 (6H, t, *J* = 7.2 Hz); <sup>13</sup>C-NMR (101 MHz, DMSO-d<sub>6</sub>) δ 166.73, 165.23, 162.89, 161.42, 158.42, 155.61, 149.49–148.92, 147.22–146.56, 141.04, 140.75, 139.69, 139.69–139.12, 137.66–136.58, 135.84, 135.21–134.68, 134.68, 134.18, 131.50, 130.84, 130.11, 129.89, 129.77, 128.66, 127.09, 126.91, 126.48, 125.96, 124.63, 123.35, 122.78, 122.39, 121.24, 120.33, 118.38, 117.20, 110.27, 110.16, 96.15, 63.79, 62.94, 45.90, 37.84, 27.30, 26.01, 21.57, 18.31, 14.23, 12.96; FT-IR ν<sub>max</sub> (ATR, cm<sup>-1</sup>) 1720, 1629, 1579, 1530, 1512, 1460, 1433, 1397, 1378, 1344, 1321, 1260, 1232, 1177, 1149, 1123, 1081, 975, 919, 812, 769, 754, 708, 683, 660, 604, 573, 535, 495, 422; HRMS (ESI<sup>+</sup>) calculated for [M]<sup>+</sup> *m/z* = 693.3323 (C<sub>45</sub>H<sub>45</sub>N<sub>2</sub>O<sub>5</sub>), Found *m/z* = 693.3328

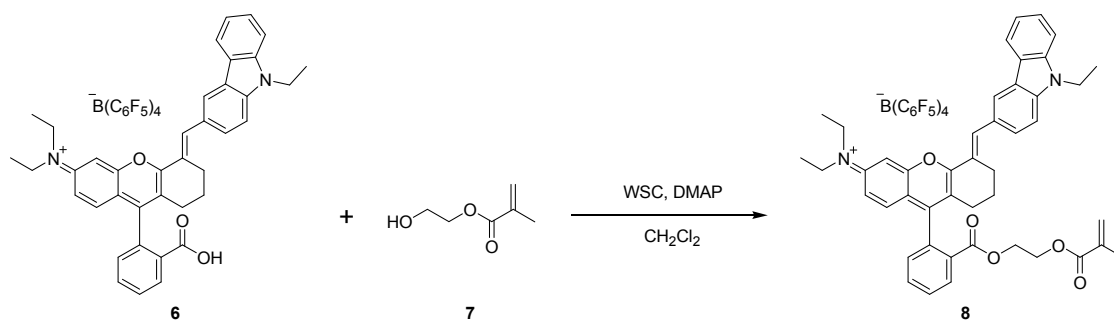

<sup>1</sup>H-NMR of 6 (CD<sub>2</sub>Cl<sub>2</sub>)

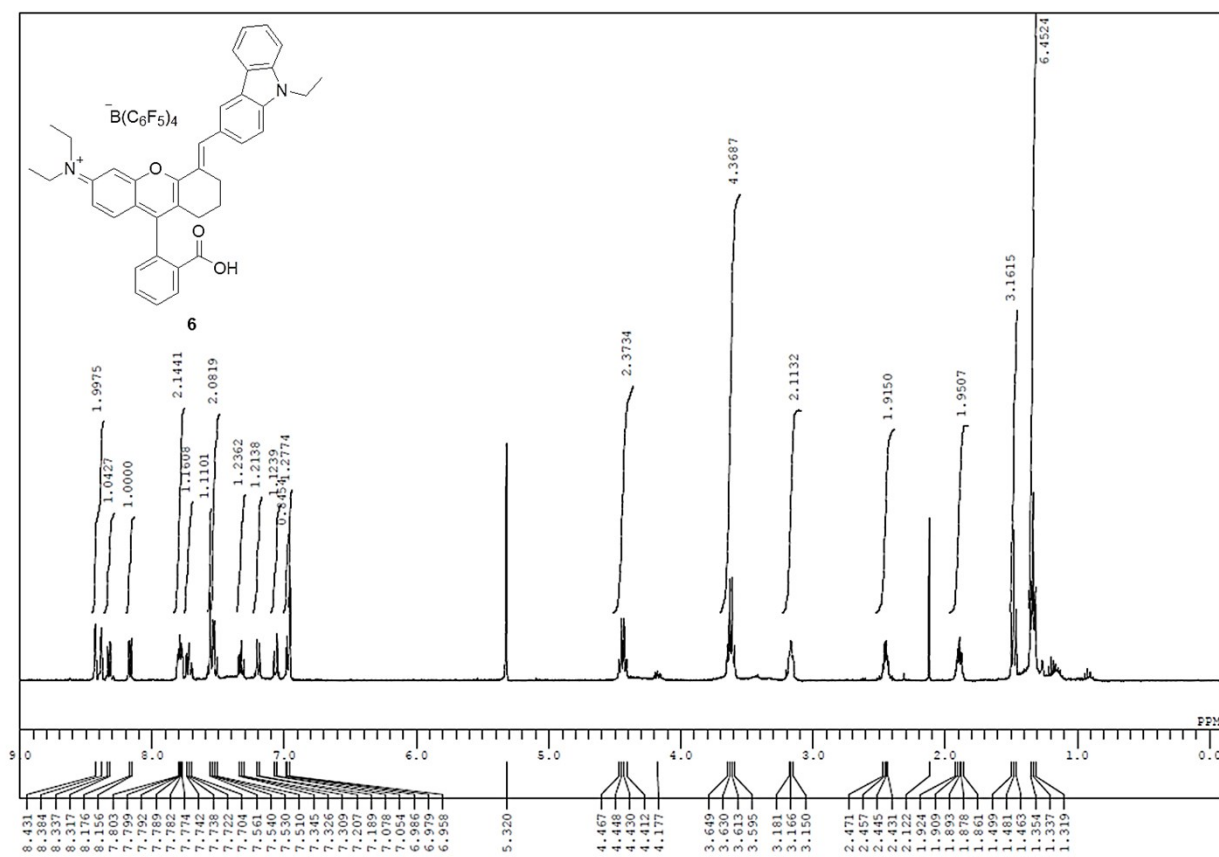

<sup>13</sup>C-NMR of 6 (CD<sub>2</sub>Cl<sub>2</sub>)

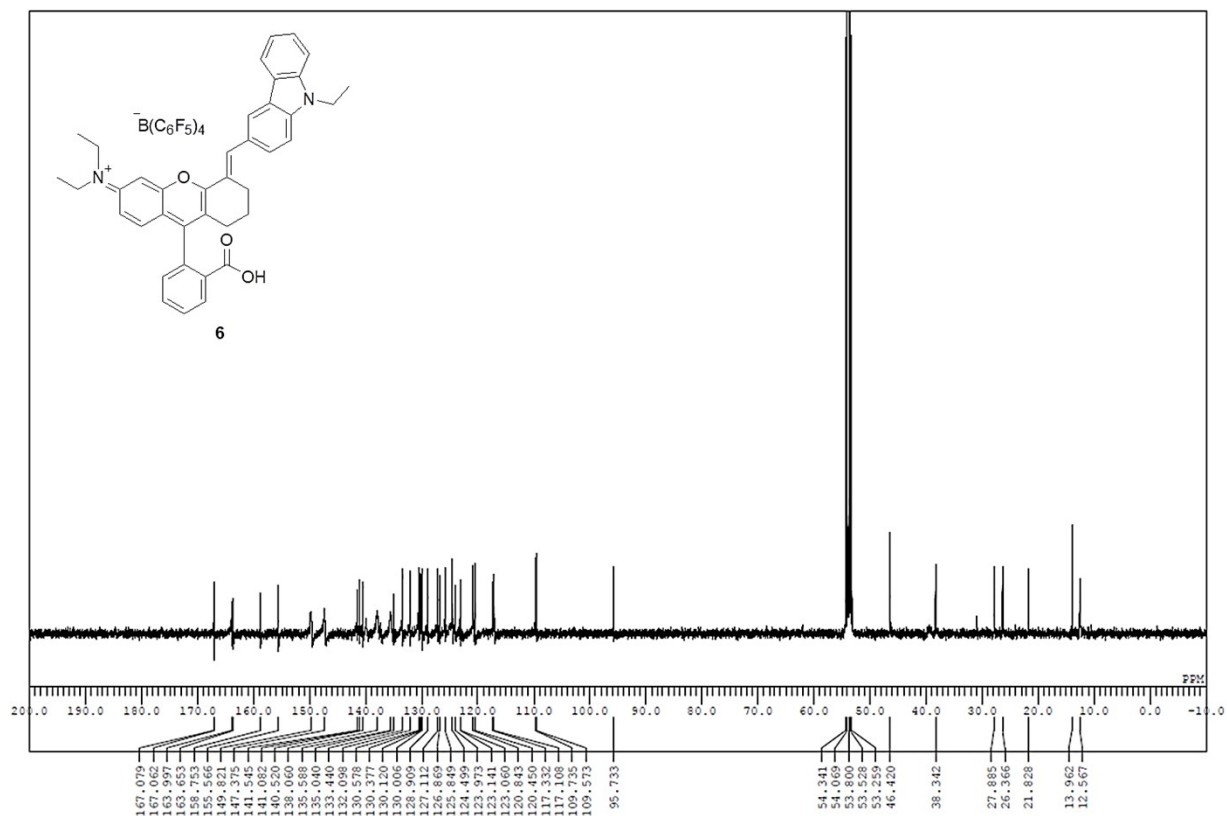

<sup>1</sup>H-NMR of 8 (DMSO-d<sub>6</sub>)

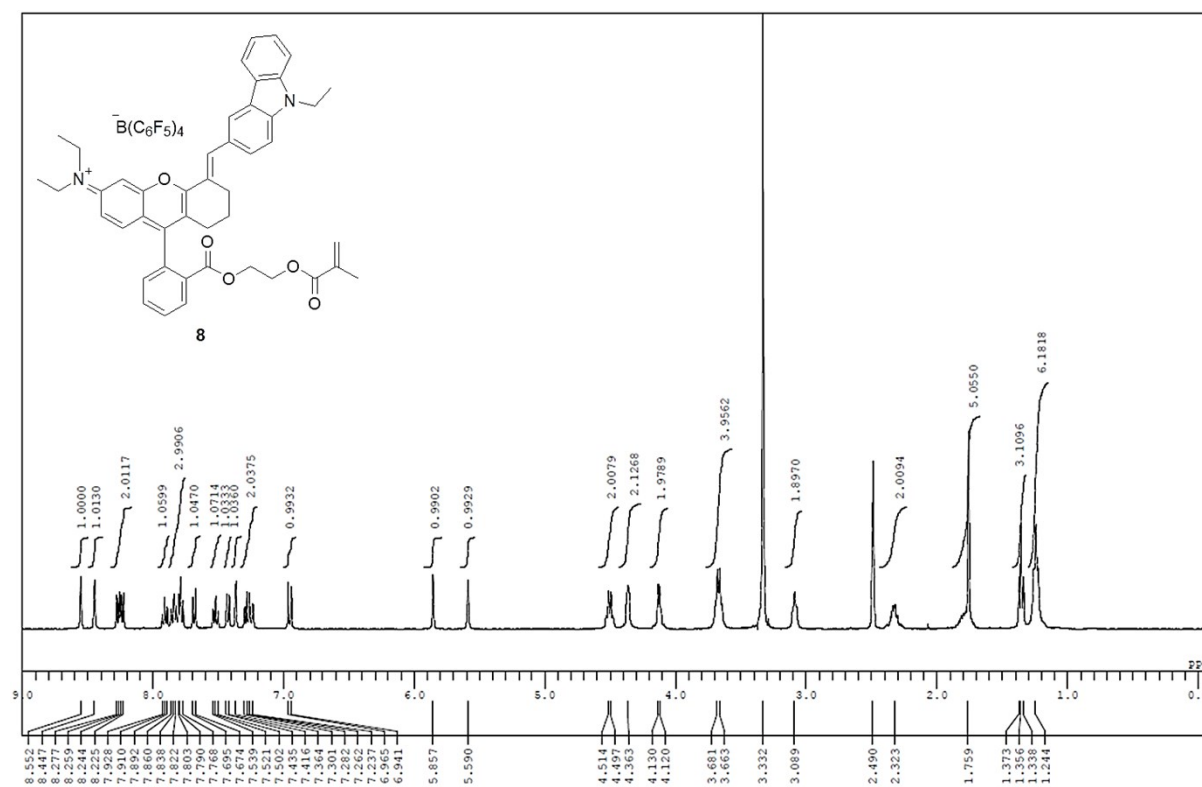

<sup>13</sup>C-NMR of 8 (DMSO-d<sub>6</sub>)

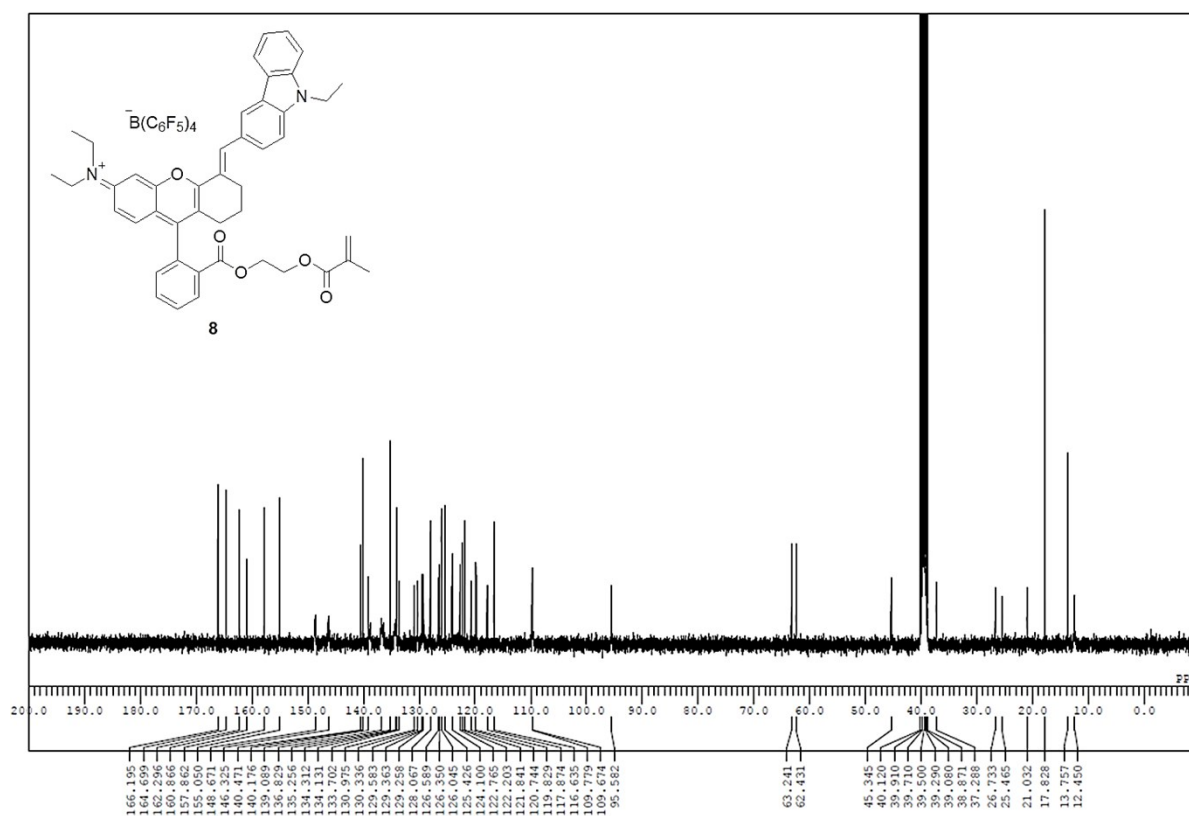

### 3. Recovery time at room temperature

The temporal change in recovery after light irradiation (AM1.5, 1 sun) at room temperature for BCy in toluene ( $1.8 \times 10^{-5}$  M) observed at 650 nm is shown in Fig. S1.  $A_0$  denotes the absorbance just after light irradiation. The data ( $A_0 - A$ ) can be fitted by a single exponential function and thus the time constant  $\tau_R$  of the recovery reaction was evaluated to be 100 min.

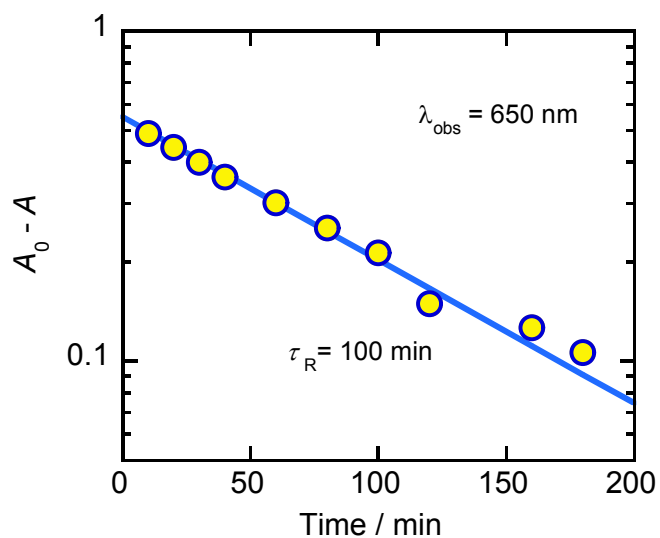

**Fig. S1** Temporal change in recovery after light irradiation for BCy in toluene observed at 650 nm at room temperature.

#### 4. Photochromic reaction of BCy in polar solvents

In some other solvents, similar photochromic behavior was observed. Fig. S2 shows the temporal change in recovery after light irradiation (AM1.5, 1 sun) at room temperature for BCy in toluene (Tol), 2-propenol (2PrOH), methanol (MeOH) and acetonitrile (MeCN) observed at 650 nm. Time constant of the recovery reaction was estimated to be 100 min for Tol, 85 min for 2PrOH, 45 min for MeOH and 35 min for MeCN. It is noted that the deviation from a single exponential function was observed at longer time range for MeOH and MeCN. This suggests that degradation of BCy occurs in MeOH and MeCN.

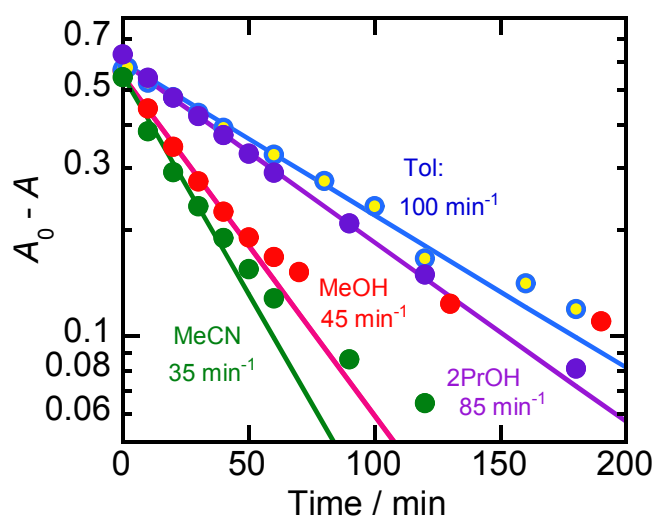

**Fig. S2** Temporal change in recovery after light irradiation for BCy in toluene (tol), 2-propenol (2PrOH), methanol (MeOH) and acetonitrile (MeCN) observed at 650 nm at room temperature.

#### 5. DFT calculation

DFT calculations of molecular structures and absorption spectra were performed using the Gaussian 09 program based on B3LYP/6-31G(d) level. To reduce calculation time, the derivative of BCy shown in Scheme S1 was used instead of the original BCy. Figure S3 shows clearly that the absorption coefficient (epsilon) of the *E*-form is sufficiently higher than that of the *Z*-form, which is consistent with the experimental results. The detail of the excitation energies and oscillator strengths of *E*- and *Z*-forms are listed in Tables S1 and S2, respectively. As the optimized structures of the *E*- and *Z*-forms of BCy in Fig. S4 show, the *E*-form is a planar structure; specifically, two chromophores (green and pink parts) are in the same plane. In contrast, the *Z*-form is a non-planar structure. Clearly, the difference in planarity leads to the large difference in absorption coefficient.



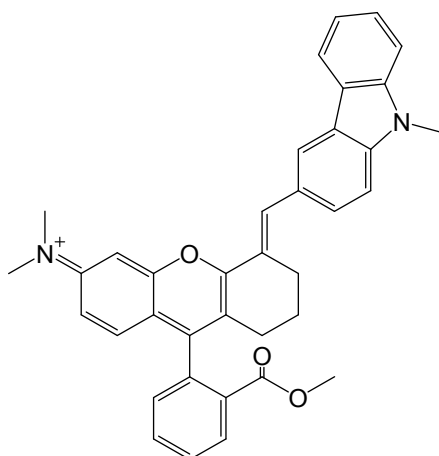

**Scheme S1** Molecular structure of the derivative of BCy for DFT calculation

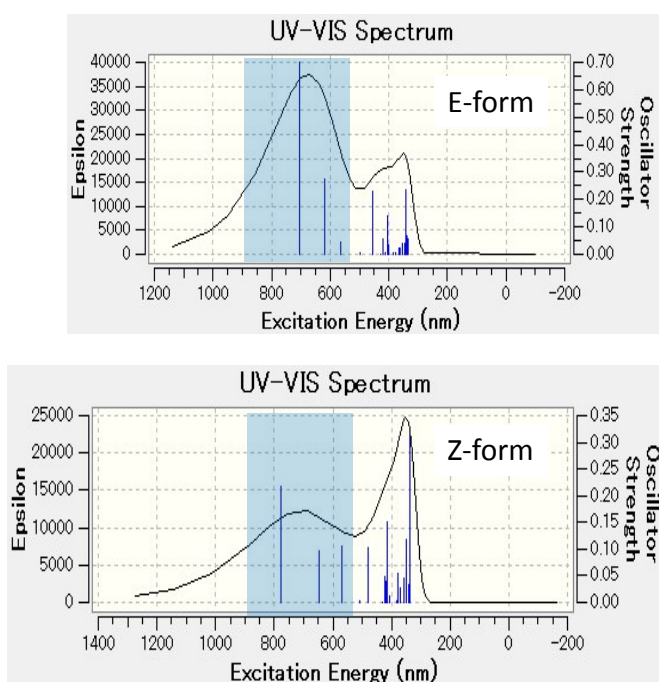

**Fig. S3** Absorption spectra of the *E*-form and *Z*-form obtained by TD-DFT calculation.

**Table S1** Calculated excitation energies and oscillator strengths of *E*-form

|               |           |           |           |           |          |              |
|---------------|-----------|-----------|-----------|-----------|----------|--------------|
| Excited State | 1:        | Singlet-A | 1.7634 eV | 703.08 nm | f=0.6992 | <S**2>=0.000 |
|               | 144 ->147 | 0.13740   |           |           |          |              |
|               | 145 ->147 | 0.24017   |           |           |          |              |
|               | 146 ->147 | 0.64417   |           |           |          |              |

This state for optimization and/or second-order correction.

Total Energy, E(TD-HF/TD-KS) = -1764.09472411

Copying the excited state density for this state as the 1-particle RhoCI density.

|               |           |           |           |           |          |              |
|---------------|-----------|-----------|-----------|-----------|----------|--------------|
| Excited State | 2:        | Singlet-A | 2.0042 eV | 618.62 nm | f=0.2735 | <S**2>=0.000 |
|               | 144 ->147 | 0.41819   |           |           |          |              |
|               | 145 ->147 | 0.49325   |           |           |          |              |
|               | 146 ->147 | -0.26550  |           |           |          |              |

|               |           |           |           |           |          |              |
|---------------|-----------|-----------|-----------|-----------|----------|--------------|
| Excited State | 3:        | Singlet-A | 2.1988 eV | 563.87 nm | f=0.0470 | <S**2>=0.000 |
|               | 144 ->147 | 0.53507   |           |           |          |              |
|               | 145 ->147 | -0.41819  |           |           |          |              |
|               | 146 ->149 | 0.13868   |           |           |          |              |

|               |           |           |           |           |          |              |
|---------------|-----------|-----------|-----------|-----------|----------|--------------|
| Excited State | 4:        | Singlet-A | 2.4813 eV | 499.68 nm | f=0.0046 | <S**2>=0.000 |
|               | 146 ->148 | 0.70401   |           |           |          |              |

|               |           |           |           |           |          |              |
|---------------|-----------|-----------|-----------|-----------|----------|--------------|
| Excited State | 5:        | Singlet-A | 2.7125 eV | 457.08 nm | f=0.2322 | <S**2>=0.000 |
|               | 143 ->147 | 0.66266   |           |           |          |              |
|               | 146 ->147 | -0.11578  |           |           |          |              |
|               | 146 ->149 | 0.10825   |           |           |          |              |

|               |           |           |           |           |          |              |
|---------------|-----------|-----------|-----------|-----------|----------|--------------|
| Excited State | 6:        | Singlet-A | 2.8955 eV | 428.20 nm | f=0.0018 | <S**2>=0.000 |
|               | 145 ->148 | 0.70457   |           |           |          |              |

|               |           |           |           |           |          |              |
|---------------|-----------|-----------|-----------|-----------|----------|--------------|
| Excited State | 7:        | Singlet-A | 2.9649 eV | 418.18 nm | f=0.0546 | <S**2>=0.000 |
|               | 142 ->147 | 0.68695   |           |           |          |              |

|               |           |           |           |           |          |              |
|---------------|-----------|-----------|-----------|-----------|----------|--------------|
| Excited State | 8:        | Singlet-A | 3.0155 eV | 411.15 nm | f=0.0042 | <S**2>=0.000 |
|               | 141 ->147 | 0.69569   |           |           |          |              |

|               |           |           |           |           |          |              |
|---------------|-----------|-----------|-----------|-----------|----------|--------------|
| Excited State | 9:        | Singlet-A | 3.0590 eV | 405.30 nm | f=0.1403 | <S**2>=0.000 |
|               | 139 ->147 | 0.14884   |           |           |          |              |
|               | 140 ->147 | 0.32875   |           |           |          |              |
|               | 144 ->148 | 0.18899   |           |           |          |              |
|               | 145 ->149 | 0.19271   |           |           |          |              |
|               | 146 ->149 | 0.52029   |           |           |          |              |
| Excited State | 10:       | Singlet-A | 3.0742 eV | 403.30 nm | f=0.0087 | <S**2>=0.000 |
|               | 140 ->147 | -0.17150  |           |           |          |              |
|               | 144 ->148 | 0.67304   |           |           |          |              |
|               | 146 ->149 | -0.10857  |           |           |          |              |
| Excited State | 11:       | Singlet-A | 3.0950 eV | 400.60 nm | f=0.0338 | <S**2>=0.000 |
|               | 139 ->147 | -0.35103  |           |           |          |              |
|               | 140 ->147 | 0.54759   |           |           |          |              |
|               | 145 ->149 | -0.11527  |           |           |          |              |
|               | 146 ->149 | -0.20944  |           |           |          |              |
| Excited State | 12:       | Singlet-A | 3.2354 eV | 383.21 nm | f=0.0029 | <S**2>=0.000 |
|               | 144 ->149 | -0.13804  |           |           |          |              |
|               | 145 ->149 | -0.27906  |           |           |          |              |
|               | 145 ->150 | -0.13550  |           |           |          |              |
|               | 146 ->150 | 0.60201   |           |           |          |              |
| Excited State | 13:       | Singlet-A | 3.3022 eV | 375.46 nm | f=0.0046 | <S**2>=0.000 |
|               | 138 ->147 | -0.12622  |           |           |          |              |
|               | 139 ->147 | 0.51239   |           |           |          |              |
|               | 140 ->147 | 0.19543   |           |           |          |              |
|               | 145 ->149 | -0.28528  |           |           |          |              |
|               | 146 ->149 | -0.13715  |           |           |          |              |
|               | 146 ->150 | -0.17321  |           |           |          |              |
|               | 146 ->151 | 0.12690   |           |           |          |              |
| Excited State | 14:       | Singlet-A | 3.3871 eV | 366.04 nm | f=0.0233 | <S**2>=0.000 |
|               | 138 ->147 | 0.27071   |           |           |          |              |
|               | 145 ->149 | 0.23120   |           |           |          |              |
|               | 146 ->150 | 0.10571   |           |           |          |              |
|               | 146 ->151 | 0.58093   |           |           |          |              |

|                   |           |           |           |          |                                  |
|-------------------|-----------|-----------|-----------|----------|----------------------------------|
| Excited State 15: | Singlet-A | 3.4322 eV | 361.24 nm | f=0.0248 | $\langle S^{*2} \rangle = 0.000$ |
| 137 -> 147        | -0.21662  |           |           |          |                                  |
| 138 -> 147        | 0.48974   |           |           |          |                                  |
| 139 -> 147        | 0.16747   |           |           |          |                                  |
| 145 -> 149        | 0.10943   |           |           |          |                                  |
| 145 -> 150        | -0.11540  |           |           |          |                                  |
| 146 -> 149        | -0.13048  |           |           |          |                                  |
| 146 -> 151        | -0.33077  |           |           |          |                                  |
| 146 -> 152        | -0.10507  |           |           |          |                                  |
| Excited State 16: | Singlet-A | 3.4952 eV | 354.72 nm | f=0.0413 | $\langle S^{*2} \rangle = 0.000$ |
| 137 -> 147        | -0.14185  |           |           |          |                                  |
| 138 -> 147        | -0.14613  |           |           |          |                                  |
| 144 -> 149        | 0.61768   |           |           |          |                                  |
| 145 -> 150        | -0.22904  |           |           |          |                                  |
| Excited State 17: | Singlet-A | 3.5939 eV | 344.99 nm | f=0.0392 | $\langle S^{*2} \rangle = 0.000$ |
| 138 -> 147        | 0.10119   |           |           |          |                                  |
| 143 -> 148        | 0.65303   |           |           |          |                                  |
| 145 -> 149        | -0.15914  |           |           |          |                                  |
| Excited State 18: | Singlet-A | 3.6228 eV | 342.23 nm | f=0.2336 | $\langle S^{*2} \rangle = 0.000$ |
| 137 -> 147        | 0.35360   |           |           |          |                                  |
| 138 -> 147        | -0.14671  |           |           |          |                                  |
| 139 -> 147        | 0.14829   |           |           |          |                                  |
| 143 -> 148        | 0.24184   |           |           |          |                                  |
| 145 -> 149        | 0.30919   |           |           |          |                                  |
| 146 -> 149        | -0.19689  |           |           |          |                                  |
| 146 -> 150        | 0.15431   |           |           |          |                                  |
| 146 -> 152        | -0.19174  |           |           |          |                                  |
| 146 -> 153        | -0.12070  |           |           |          |                                  |
| Excited State 19: | Singlet-A | 3.6525 eV | 339.45 nm | f=0.0667 | $\langle S^{*2} \rangle = 0.000$ |
| 137 -> 147        | -0.33999  |           |           |          |                                  |
| 144 -> 150        | -0.16335  |           |           |          |                                  |
| 145 -> 150        | 0.53120   |           |           |          |                                  |
| 146 -> 150        | 0.16865   |           |           |          |                                  |

|                   |           |           |           |          |              |
|-------------------|-----------|-----------|-----------|----------|--------------|
| Excited State 20: | Singlet-A | 3.6906 eV | 335.94 nm | f=0.0584 | <S**2>=0.000 |
| 137 ->147         | -0.20001  |           |           |          |              |
| 138 ->147         | -0.16597  |           |           |          |              |
| 144 ->149         | -0.13675  |           |           |          |              |
| 145 ->149         | 0.16317   |           |           |          |              |
| 145 ->150         | -0.10631  |           |           |          |              |
| 145 ->151         | -0.13494  |           |           |          |              |
| 146 ->149         | -0.11124  |           |           |          |              |
| 146 ->152         | 0.52270   |           |           |          |              |
| 146 ->153         | -0.12982  |           |           |          |              |

**Table S2** Calculated excitation energies and oscillator strengths of Z-form

|                  |           |           |           |          |              |
|------------------|-----------|-----------|-----------|----------|--------------|
| Excited State 1: | Singlet-A | 1.5990 eV | 775.37 nm | f=0.2164 | <S**2>=0.000 |
| 145 ->147        | 0.19777   |           |           |          |              |
| 146 ->147        | 0.66963   |           |           |          |              |

This state for optimization and/or second-order correction.

Total Energy, E(TD-HF/TD-KS) = -1764.09253050

Copying the excited state density for this state as the 1-particle RhoCI density.

|                  |           |           |           |          |              |
|------------------|-----------|-----------|-----------|----------|--------------|
| Excited State 2: | Singlet-A | 1.9165 eV | 646.93 nm | f=0.0977 | <S**2>=0.000 |
| 144 ->147        | -0.41422  |           |           |          |              |
| 145 ->147        | 0.52891   |           |           |          |              |
| 146 ->147        | -0.19996  |           |           |          |              |

|                  |           |           |           |          |              |
|------------------|-----------|-----------|-----------|----------|--------------|
| Excited State 3: | Singlet-A | 2.1792 eV | 568.93 nm | f=0.1058 | <S**2>=0.000 |
| 144 ->147        | 0.54704   |           |           |          |              |
| 145 ->147        | 0.40024   |           |           |          |              |
| 146 ->149        | -0.14157  |           |           |          |              |

|                  |           |           |           |          |              |
|------------------|-----------|-----------|-----------|----------|--------------|
| Excited State 4: | Singlet-A | 2.4443 eV | 507.24 nm | f=0.0020 | <S**2>=0.000 |
| 146 ->148        | 0.70328   |           |           |          |              |

|                  |           |           |           |          |              |
|------------------|-----------|-----------|-----------|----------|--------------|
| Excited State 5: | Singlet-A | 2.5885 eV | 478.98 nm | f=0.1018 | <S**2>=0.000 |
| 143 ->147        | 0.67387   |           |           |          |              |

|               |           |           |           |           |          |              |
|---------------|-----------|-----------|-----------|-----------|----------|--------------|
| Excited State | 6:        | Singlet-A | 2.8713 eV | 431.80 nm | f=0.0005 | <S**2>=0.000 |
|               | 145 ->148 | 0.70529   |           |           |          |              |
| Excited State | 7:        | Singlet-A | 2.9426 eV | 421.34 nm | f=0.0493 | <S**2>=0.000 |
|               | 142 ->147 | 0.67927   |           |           |          |              |
| Excited State | 8:        | Singlet-A | 2.9730 eV | 417.03 nm | f=0.0402 | <S**2>=0.000 |
|               | 141 ->147 | 0.63851   |           |           |          |              |
|               | 146 ->149 | -0.26531  |           |           |          |              |
| Excited State | 9:        | Singlet-A | 2.9896 eV | 414.72 nm | f=0.1505 | <S**2>=0.000 |
|               | 139 ->147 | 0.13884   |           |           |          |              |
|               | 140 ->147 | 0.23563   |           |           |          |              |
|               | 141 ->147 | 0.27406   |           |           |          |              |
|               | 145 ->149 | 0.21052   |           |           |          |              |
|               | 146 ->149 | 0.52791   |           |           |          |              |
| Excited State | 10:       | Singlet-A | 3.0504 eV | 406.45 nm | f=0.0109 | <S**2>=0.000 |
|               | 139 ->147 | -0.34747  |           |           |          |              |
|               | 140 ->147 | 0.56686   |           |           |          |              |
|               | 144 ->148 | -0.19180  |           |           |          |              |
| Excited State | 11:       | Singlet-A | 3.0566 eV | 405.63 nm | f=0.0039 | <S**2>=0.000 |
|               | 139 ->147 | -0.12234  |           |           |          |              |
|               | 140 ->147 | 0.13893   |           |           |          |              |
|               | 144 ->148 | 0.67683   |           |           |          |              |
| Excited State | 12:       | Singlet-A | 3.2392 eV | 382.76 nm | f=0.0021 | <S**2>=0.000 |
|               | 139 ->147 | 0.34969   |           |           |          |              |
|               | 140 ->147 | 0.16708   |           |           |          |              |
|               | 144 ->149 | 0.15357   |           |           |          |              |
|               | 145 ->149 | -0.34068  |           |           |          |              |
|               | 146 ->150 | 0.41373   |           |           |          |              |
| Excited State | 13:       | Singlet-A | 3.2858 eV | 377.34 nm | f=0.0541 | <S**2>=0.000 |
|               | 137 ->147 | 0.11748   |           |           |          |              |
|               | 139 ->147 | -0.40658  |           |           |          |              |
|               | 140 ->147 | -0.21360  |           |           |          |              |
|               | 144 ->149 | 0.15233   |           |           |          |              |

|                   |           |           |           |          |              |  |
|-------------------|-----------|-----------|-----------|----------|--------------|--|
|                   | 146 ->149 | 0.14801   |           |          |              |  |
|                   | 146 ->150 | 0.42340   |           |          |              |  |
| Excited State 14: | Singlet-A | 3.3367 eV | 371.57 nm | f=0.0270 | <S**2>=0.000 |  |
|                   | 137 ->147 | 0.12057   |           |          |              |  |
|                   | 138 ->147 | 0.45350   |           |          |              |  |
|                   | 145 ->149 | -0.28389  |           |          |              |  |
|                   | 146 ->150 | -0.19102  |           |          |              |  |
|                   | 146 ->151 | -0.37623  |           |          |              |  |
| Excited State 15: | Singlet-A | 3.3669 eV | 368.24 nm | f=0.0176 | <S**2>=0.000 |  |
|                   | 137 ->147 | 0.15958   |           |          |              |  |
|                   | 138 ->147 | 0.33623   |           |          |              |  |
|                   | 146 ->151 | 0.56041   |           |          |              |  |
|                   | 146 ->152 | 0.12425   |           |          |              |  |
| Excited State 16: | Singlet-A | 3.4546 eV | 358.90 nm | f=0.0454 | <S**2>=0.000 |  |
|                   | 137 ->147 | 0.13336   |           |          |              |  |
|                   | 138 ->147 | -0.19885  |           |          |              |  |
|                   | 144 ->149 | 0.56824   |           |          |              |  |
|                   | 145 ->149 | -0.14012  |           |          |              |  |
|                   | 145 ->150 | 0.16675   |           |          |              |  |
|                   | 146 ->150 | -0.20971  |           |          |              |  |
| Excited State 17: | Singlet-A | 3.5408 eV | 350.16 nm | f=0.0193 | <S**2>=0.000 |  |
|                   | 137 ->147 | 0.13342   |           |          |              |  |
|                   | 143 ->148 | 0.67000   |           |          |              |  |
|                   | 145 ->149 | 0.10694   |           |          |              |  |
| Excited State 18: | Singlet-A | 3.5441 eV | 349.83 nm | f=0.1175 | <S**2>=0.000 |  |
|                   | 137 ->147 | 0.49551   |           |          |              |  |
|                   | 139 ->147 | 0.11338   |           |          |              |  |
|                   | 143 ->148 | -0.20242  |           |          |              |  |
|                   | 145 ->149 | 0.21292   |           |          |              |  |
|                   | 146 ->149 | -0.12057  |           |          |              |  |
|                   | 146 ->152 | -0.30751  |           |          |              |  |
| Excited State 19: | Singlet-A | 3.6142 eV | 343.04 nm | f=0.0346 | <S**2>=0.000 |  |

|           |          |
|-----------|----------|
| 137 ->147 | 0.25421  |
| 144 ->150 | -0.11843 |
| 145 ->150 | -0.42219 |
| 146 ->152 | 0.44108  |

|                   |           |           |           |          |              |
|-------------------|-----------|-----------|-----------|----------|--------------|
| Excited State 20: | Singlet-A | 3.6688 eV | 337.94 nm | f=0.3227 | <S**2>=0.000 |
| 137 ->147         | -0.16669  |           |           |          |              |
| 138 ->147         | 0.22300   |           |           |          |              |
| 144 ->149         | 0.16693   |           |           |          |              |
| 144 ->150         | 0.14436   |           |           |          |              |
| 145 ->149         | 0.29772   |           |           |          |              |
| 145 ->150         | 0.23532   |           |           |          |              |
| 146 ->149         | -0.15395  |           |           |          |              |
| 146 ->150         | 0.13179   |           |           |          |              |
| 146 ->152         | 0.29523   |           |           |          |              |
| 146 ->153         | -0.14763  |           |           |          |              |



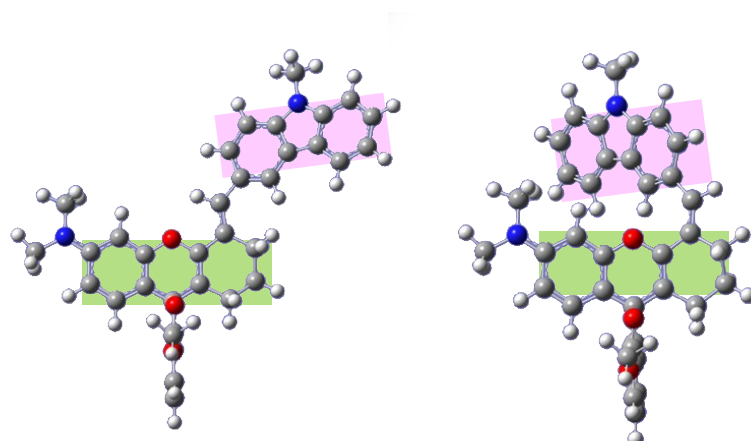

E-form

Z-form

| Total energy (a.u.) |                | $\Delta_{E-Z}$<br>(kcal/mol) |
|---------------------|----------------|------------------------------|
| <i>E</i> -form      | <i>Z</i> -form |                              |
| -1764.92452         | -1764.83092    | 58.7                         |

**Fig. S4** Optimized structures of the *E*-form and *Z*-form obtained by DFT calculation.

## 6. NMR study on the molecular structure of BCy before and after light irradiation

Molecular structure change of BCy induced by light irradiation was studied by NMR. Fig. S5 shows key ROESY correlations of BCy in DMSO- $d_6$  under dark condition. The correlation peaks (red circles) were clearly observed. This indicates that BCy before light irradiation is E-form. In order to study photo-induced conformation change of E-form of BCy,  $^1\text{H}$ -NMR spectra of BCy in  $\text{CD}_3\text{OD}$  were measured before and after light irradiation (Fig. S6). Large shift of Ha indicates significant change of the anisotropy effect from carbazole moiety. This suggests isomerization from E-form to Z-form occurs by light irradiation.

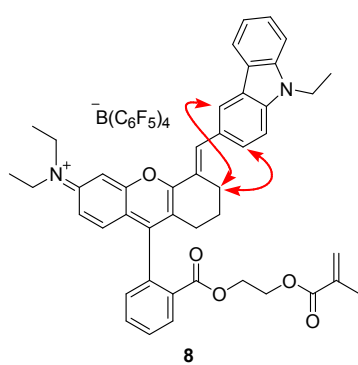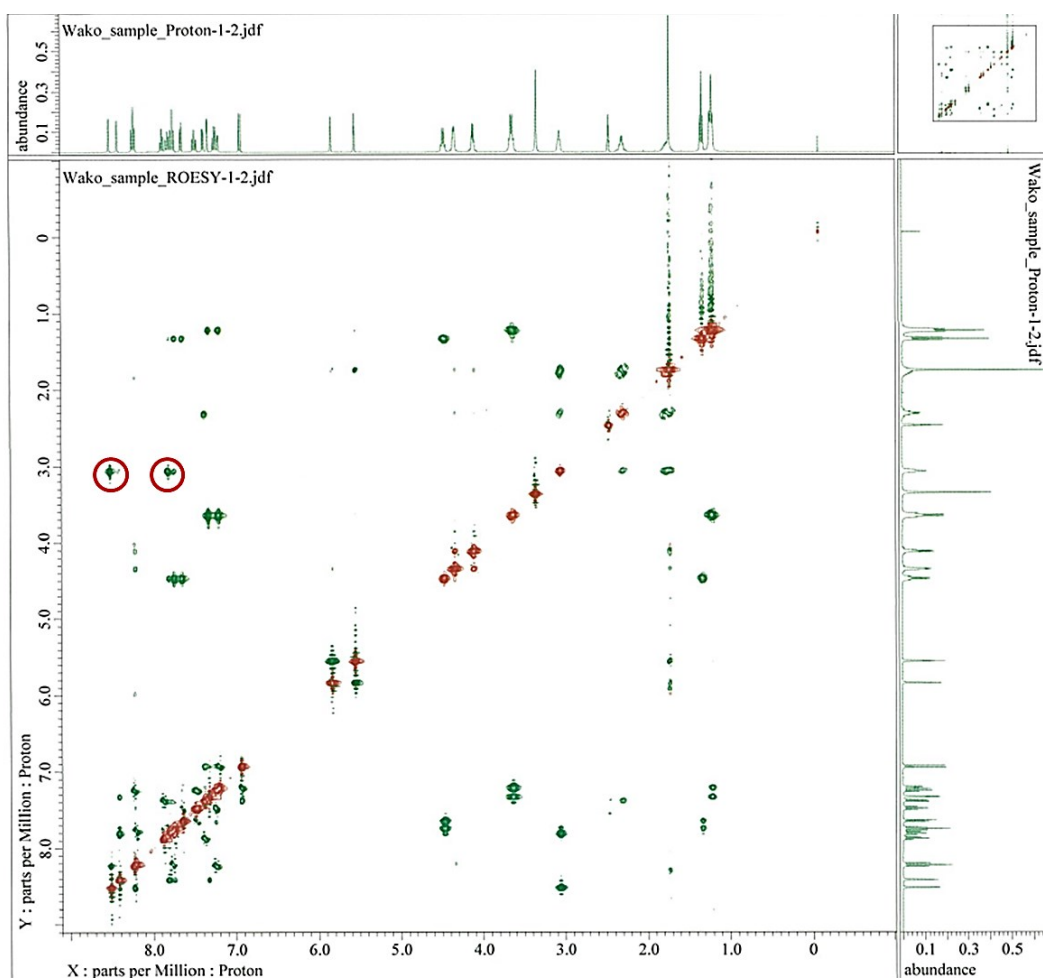

**Fig. S5** Key ROESY correlations of BCy in DMSO- $d_6$ .

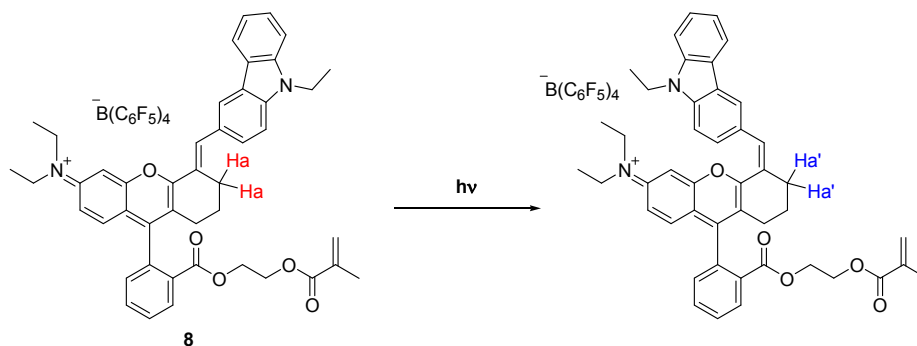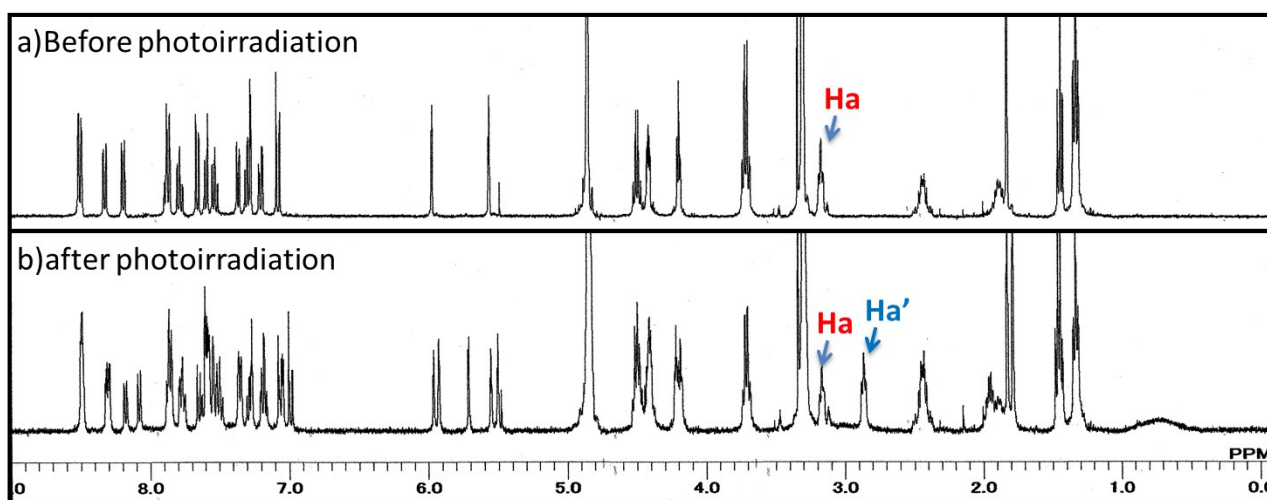

Fig. S6  $^1\text{H}$ -NMR spectra of BCy in  $\text{CD}_3\text{OD}$  before and after light irradiation.

## 7. Quantum yield of the photochromic reaction of BCy in toluene

Absorption spectra of BCy in toluene under photostationary state (Fig. 1) were divided into two components of E- and Z-forms based on the similarity with the spectra obtained in acetonitrile shown in Fig. 2b. Fig. S7 shows the absorption spectra of E- and Z-forms of BCy in toluene. From this, the ratio of E/Z forms of BCy in toluene was estimated to be 0.24 in photostationary state under AM1.5 (1 sun) irradiation condition shown in Fig. 1a.

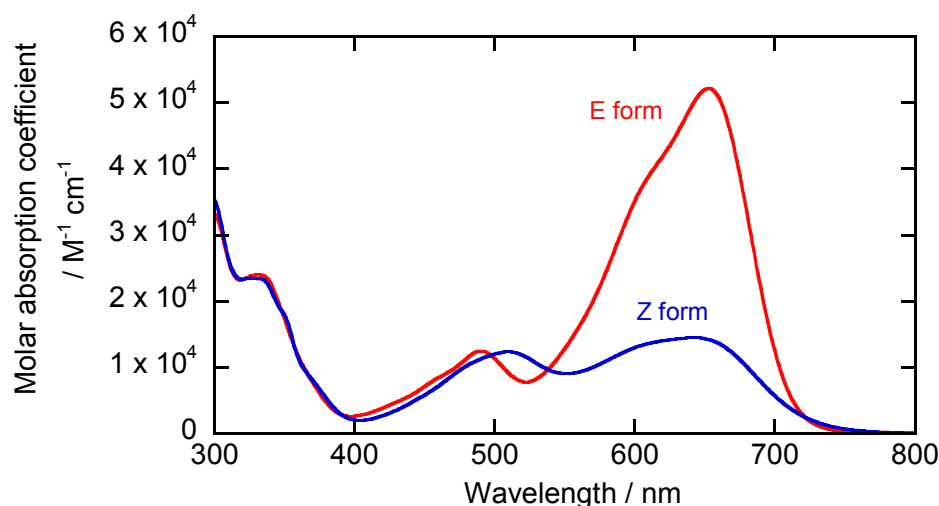

**Fig. S7** Absorption spectra of E-form and Z-form of BCy in toluene

In order to estimate the quantum yield of the forward ( $\text{E} \rightarrow \text{Z}$ ) and the recovery ( $\text{Z} \rightarrow \text{E}$ ) reactions, the temporal change of absorbance during light irradiation at room temperature was observed at 633 nm (Fig. S8). Excitation was carried out at 633 nm using He-Ne laser (JDSU, 1125P, 5 mW). After light irradiation for several seconds, absorbance at 633 nm was immediately measured with an absorption spectrometer (V-670, JUSCO). As shown in Fig. S8, the absorbance decreases with time and then becomes constant. This clearly indicates that the reaction reaches to the photostationary state.

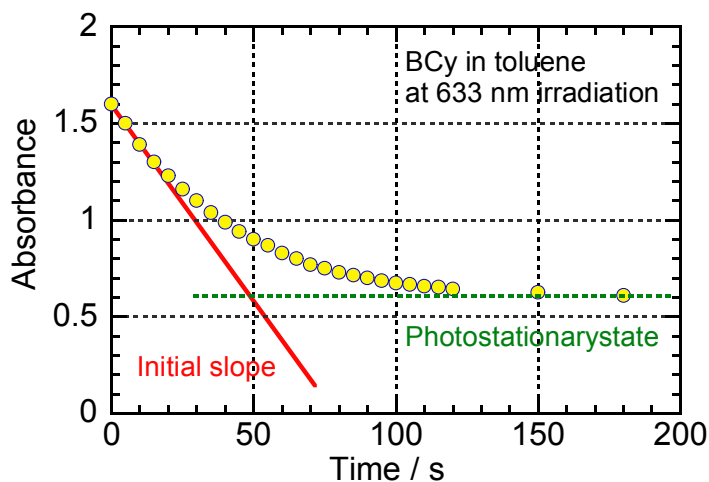

**Fig. S8** Temporal change of absorbance observed at 633 nm during light irradiation at 633 nm of BCy in toluene at room temperature.

Temporal change of the concentration  $[E]$  of E-form can be expressed as

$$\frac{d[E]}{dt} = -N_{\text{photon}}^{\text{abs}} \frac{A_E}{A_{\text{obs}}} \Phi_{E \rightarrow Z} + N_{\text{photon}}^{\text{abs}} \frac{A_Z}{A_{\text{obs}}} \Phi_{Z \rightarrow E} - k_T ([E_0] - [E]) \quad (\text{eq. S1})$$

where  $N_{\text{photon}}^{\text{abs}}$  is the concentration of the absorbed photon per unit time in the sample solution,  $[E_0]$  is the initial concentration of E,  $A_E$  and  $A_Z$  is the absorbance due to E-form and Z-form, respectively and  $\Phi_{E \rightarrow Z}$  and  $\Phi_{Z \rightarrow E}$  is the quantum yield of E $\rightarrow$ Z and Z $\rightarrow$ E reactions, respectively and  $k_T$  is the rate constant of the thermal recovery reaction. In the present case, the third term in the right hand side of eq. S1 can be ignored because the thermal recovery reaction (Fig. S1) is much slower than the temporal change observed shown in Fig. S8.

At the initial stage of light irradiation,  $[E]$  equals  $[E_0]$  and thus the second term can be neglected. Hence,  $\Phi_{E \rightarrow Z}$  could be estimated to be 0.046 from the initial slope shown in Fig. S8 using the values of the volume of the sample solution (2.9 mL) the light intensity (5 mW) and absorbance (1.6) at the excitation wavelength (633 nm).

After sufficient light irradiation time, the absorbance reaches photostationary state. At the condition, eq. S1 can be solved as

$$\Phi_{Z \rightarrow E} = \frac{\varepsilon_E}{\varepsilon_Z} \frac{[E]}{[Z]} \Phi_{E \rightarrow Z} \quad (\text{eq. S2})$$

where  $\varepsilon_E$  and  $\varepsilon_Z$  are the molar absorption coefficients of E- and Z-forms at the observed wavelength

(633 nm), respectively. Hence,  $\Phi_{Z \rightarrow E}$  could be estimated to be 0.015 using the values of  $\varepsilon_E = 4.6 \times 10^4 \text{ M}^{-1}\text{cm}^{-1}$  and  $\varepsilon_Z = 1.4 \times 10^4 \text{ M}^{-1}\text{cm}^{-1}$  at 633 nm (Fig. S7), the relative ratio  $[E]/[Z] = 0.1$  obtained from the analysis of the absorption spectra.

## 8. Temperature dependence of the recovery time

The temporal change in recovery after light irradiation for BCy in toluene observed at 650 nm used for the Arrhenius plot (Fig. 3) is shown in Figure S9.

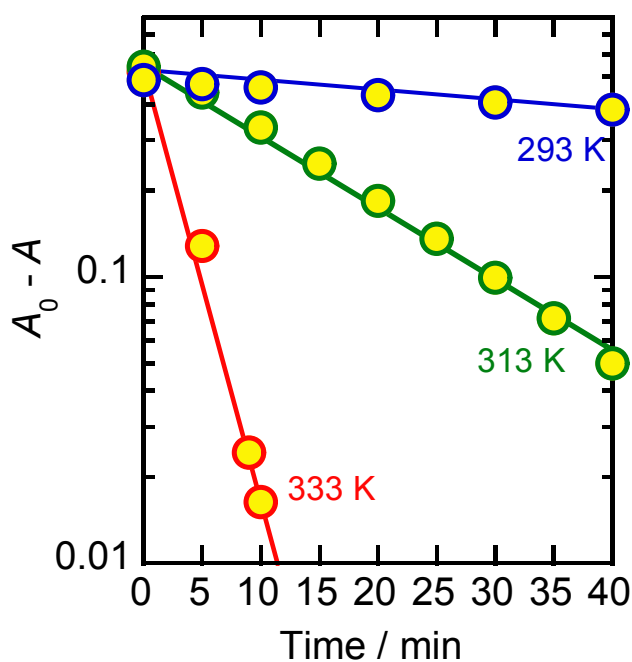

**Fig. S9** Temporal change in recovery after light irradiation for BCy in toluene observed at 650 nm at various temperatures.
